# Supplementary material for: Zn(ii) and Cu(ii) coordination polymers assembled from V-shaped tetracarboxylate ligands and N-donor ancillary ligands: syntheses, structures and properties
Source: Royal Society of Chemistry journal article supplement (doi:10.1039/b806297h), 2008-12-19
Supplement: b806297h.pdf [file b806297h.pdf]

## Supplementary Information for:

# Zn(II) and Cu(II) coordination polymers assembled from V-shaped tetracarboxylate ligands and N-donor ancillary ligands: syntheses, structures and properties

Guang-Xiang Liu\*, Rong-Yi Huang, Liang-Fang Huang and Xiao-Ming Ren

*Anhui Key Laboratory of Functional Coordination Compounds, School of Chemistry and Chemical Engineering, Anqing Normal University, Anqing 246003, P. R. China*

E-mail: [liugx@live.com](mailto:liugx@live.com)

**Table S1.** Distance [ $\text{\AA}$ ] and angles [ $^\circ$ ] of hydrogen bonding for complexes **1**, **2** and **5**

| D-H $\cdots$ A                                                                                         | $d(\text{D-H})$ | $d(\text{H}\cdots\text{A})$ | $d(\text{D}\cdots\text{A})$ | $\angle(\text{DHA})$ |
|--------------------------------------------------------------------------------------------------------|-----------------|-----------------------------|-----------------------------|----------------------|
| <b>[Zn<sub>2</sub>(SA)(phen)<sub>2</sub>]<math>\cdot</math>2H<sub>2</sub>O (<b>1</b>)</b>              |                 |                             |                             |                      |
| O1W-H1WA $\cdots$ O4#1                                                                                 | 0.87(6)         | 2.12(7)                     | 2.953(10)                   | 161(10)              |
| C4-H4 $\cdots$ O6                                                                                      | 0.93            | 2.56                        | 2.916(8)                    | 103                  |
| C9-H9 $\cdots$ O1                                                                                      | 0.93            | 2.54                        | 3.070(9)                    | 117                  |
| C11-H11 $\cdots$ O6#2                                                                                  | 0.93            | 2.52                        | 3.40(10)                    | 157                  |
| C18-H18 $\cdots$ O3#3                                                                                  | 0.93            | 2.53                        | 3.442(9)                    | 168                  |
| <b>Zn<sub>2</sub>(FA)(phen)<sub>2</sub>(H<sub>2</sub>O)<math>\cdot</math>H<sub>2</sub>O (<b>2</b>)</b> |                 |                             |                             |                      |
| O1W-H1WA $\cdots$ O6#4                                                                                 | 0.83(3)         | 1.93(3)                     | 2.738 (3)                   | 162(4)               |

---

|                |         |         |          |        |
|----------------|---------|---------|----------|--------|
| O1W-H1WB...O2  | 0.85(3) | 2.01(3) | 2.840(3) | 156(3) |
| C4-H4...F5     | 0.93    | 2.33    | 2.974(3) | 126    |
| C13-H13...F2   | 0.93    | 2.39    | 3.004(3) | 124    |
| C22-H22...O4#5 | 0.93    | 2.59    | 3.401(3) | 146    |
| C32-H32...O5   | 0.93    | 2.55    | 3.335(3) | 142    |
| C37-H37...O8#6 | 0.93    | 2.56    | 3.275(3) | 134    |
| C41-H41...O1W  | 0.93    | 2.49    | 3.060(3) | 120    |

---

**Cu<sub>3</sub>(H<sub>2</sub>FA)<sub>3</sub>(phen)<sub>3</sub>·H<sub>2</sub>O (3)**

---

|                  |         |         |          |        |
|------------------|---------|---------|----------|--------|
| O1W-H1WA...O10#7 | 0.85(4) | 1.88(4) | 2.679(4) | 156(4) |
| O1W-H1WB...O16#8 | 0.87(3) | 1.92(3) | 2.784(4) | 173(4) |
| O4-H4...O17      | 0.83    | 1.71    | 2.518(3) | 166    |
| O8-H8...O23#9    | 0.82    | 1.80    | 2.619(3) | 180    |
| O12-H12...O16#10 | 0.82    | 1.91    | 2.719(4) | 166    |
| O14-H14...O2#11  | 0.82    | 1.91    | 2.719(4) | 166    |
| O19-H19...O1W    | 0.83(5) | 1.72(5) | 2.540(4) | 171(5) |
| O22-H22...O6#12  | 0.82    | 1.91    | 2.719(4) | 166    |

---

**Cu(H<sub>2</sub>FA)(2,2'-bipy)·1.54(H<sub>2</sub>O) (4)**

---

|                 |      |      |          |     |
|-----------------|------|------|----------|-----|
| O5-H5...O3#13   | 0.82 | 1.76 | 2.580(4) | 173 |
| O7-H7...O2#14   | 0.82 | 1.74 | 2.554(4) | 176 |
| C20-H20...O2#15 | 0.93 | 2.46 | 3.254(4) | 143 |
| C22-H22...O3#16 | 0.93 | 2.46 | 3.361(5) | 162 |

---

**[Cu<sub>2</sub>(SA)(4,4'-bipy)<sub>1.5</sub>]·2.7(H<sub>2</sub>O) (5)**

---

|               |      |      |          |     |
|---------------|------|------|----------|-----|
| C3-H3...O10   | 0.93 | 2.54 | 2.921(7) | 105 |
| C3-H3...O4#17 | 0.93 | 2.56 | 3.338(7) | 141 |
| C11-H11...O9  | 0.93 | 2.57 | 2.938(7) | 104 |

---

|                  |      |      |           |     |
|------------------|------|------|-----------|-----|
| C17-H17...O2     | 0.93 | 2.26 | 2.809(7)  | 117 |
| C21-H21...O8#18  | 0.93 | 2.38 | 2.937(7)  | 118 |
| C24-H24...O4#19  | 0.93 | 2.57 | 3.009(8)  | 109 |
| C26-H26...O1W#20 | 0.93 | 2.28 | 3.128(11) | 151 |
| C25-H25...O5#21  | 0.93 | 2.55 | 3.379(8)  | 149 |
| C27-H27...O1     | 0.93 | 2.38 | 2.818(18) | 108 |
| C31-H31...O7#18  | 0.93 | 2.54 | 3.098(7)  | 119 |

---

[Zn<sub>2</sub>(SA)(4,4'-bipy)<sub>2</sub>] $\cdot$ 8H<sub>2</sub>O (**6**)

---

|                  |      |      |           |     |
|------------------|------|------|-----------|-----|
| C5-H5...O5       | 0.93 | 2.50 | 2.890(10) | 106 |
| C9-H9...O2       | 0.93 | 2.45 | 3.262(10) | 138 |
| C10-H10...O3W    | 0.93 | 2.42 | 3.21(3)   | 142 |
| C10-H10...O3W#12 | 0.93 | 2.59 | 3.49(3)   | 162 |
| C14-H14...O5#23  | 0.93 | 2.59 | 3.176(10) | 122 |

---

Symmetry codes: #1  $x, 1/2-y, z$ ; #2  $x, y, 1+z$ ; #3  $1-x, -y, -z$ ; #4  $1/2-x, 1/2+y, 1/2-z$ ; #5  $x, 1+y, z$ ; #6  $1/2+x, -1/2-y, 1/2+z$ ; #7  $-x, 1-y, 1-z$ ; #8  $x-1/2, -y+1/2, z-1/2$ ; #9  $-x, 1-y, -z$ ; #10  $-x-1/2, y-1/2, -z+1/2$ ; #11  $x-3/2, -y+1/2, z-3/2$ ; #12  $x, y-1, z$ ; #13  $3/2-x, -y, -1/2+z$ ; #14  $1/2+x, 1/2-y, 1-z$ ; #15  $-1+x, y, z$ ; #16  $-x, 1/2+y, 3/2-z$ ; #17  $1/4+x, 1/4-y, 1/4+z$ ; #18  $-1/4+x, 1/4-y, 3/4+z$ ; #19  $-x, -y, z$ ; #20  $1/4-x, -1/4+y, 3/4+z$ ; #21  $1/2-x, -y, 1/2+z$ ; #22  $-x, y, 3/2-z$ ; #22  $-1/2+x, 1/2+y, z$ .

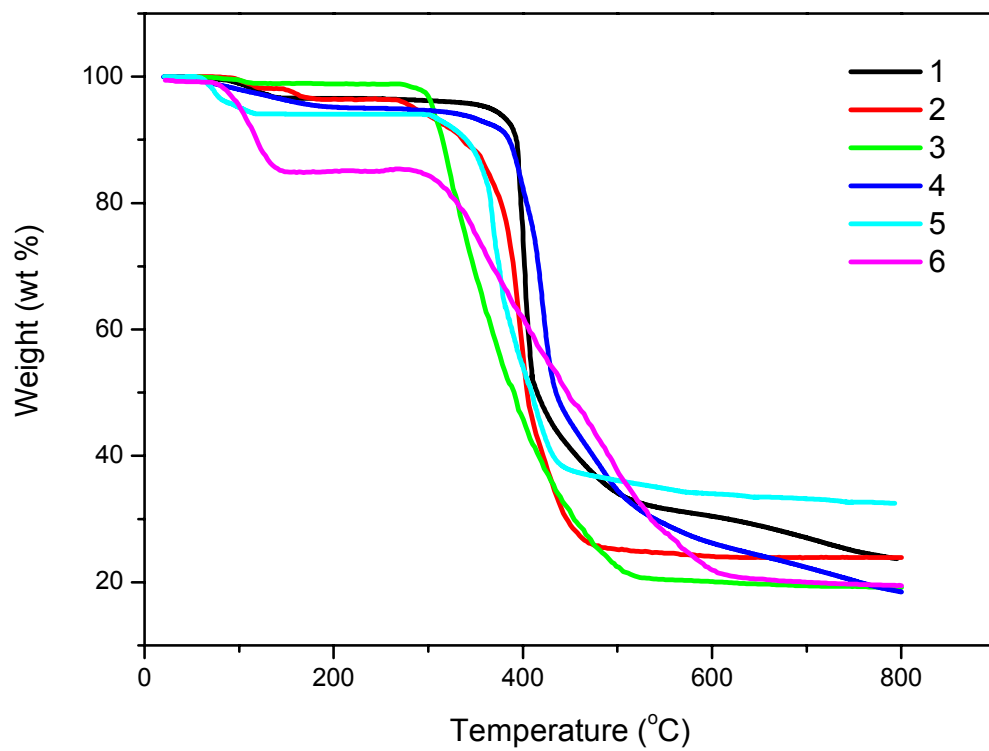

Figure S1. The TG curves of complexes **1** - **6**.
